# Supplementary material for: Evaluation of salt tolerance in Eruca sativa accessions based on morpho-physiological traits
Source: PeerJ journal article supplement (doi:10.7717/peerj.9749), 2020-08-13
Supplement: Raw_data_Afsar_et_al.,_2020-PeerJ_20.5.2020.xlsx [file Raw_data_Afsar_et_al.%2C_2020-PeerJ_20.5.2020.xlsx]

## Sheet: Morphological traits
			Shoot length (inches)	Root length (inches)	Plant Height (inches)	Number of leaves	Leaf area (inches2)
Sr No	Accession
1	Es-1	Control	2.27	2.52	4.6	4	0.05
		Control	1.94	2.66	3.77	4	0.04
		Control	1.83	2.11	3.75	4	0.04
		Control	1.58	2.32	3.37	4	0.05
		Control	1.85	2.41	5.3	5	0.05
		Treatment	2.15	1.8	3.59	3	0.02
		Treatment	1.3	1.5	2.4	3	0.04
		Treatment	1.69	1.49	3.12	3	0.03
		Treatment	1.01	1.52	2.81	2	0.04
		Treatment	2.29	1.38	3.48	2	0.03
2	Es-2	Control	3.18	2.18	5.14	4	0.09
		Control	2.84	1.89	5.14	4	0.09
		Control	2.52	1.98	4.28	4	0.08
		Control	2.81	1.66	5.25	5	0.07
		Control	2.8	1.95	5.15	5	0.07
		Treatment	1.76	1.26	2.45	4	0.04
		Treatment	1.66	1.3	3.03	3	0.04
		Treatment	1.64	1.54	2.22	3	0.03
		Treatment	1.28	1.09	2.87	2	0.05
		Treatment	1.38	1.18	2.08	2	0.04
3	Es-3	Control	3.47	2.46	4	4	0.16
		Control	3.54	2.62	4.67	4	0.15
		Control	3.98	2.5	5.32	4	0.16
		Control	3.38	1.91	4.51	5	0.15
		Control	3.2	2.28	4.62	5	0.17
		Treatment	0.87	0.52	1.2	2	0.01
		Treatment	0.54	0.31	1.14	1	0.02
		Treatment	0.78	0.56	1.34	1	0.01
		Treatment	0.48	0.53	1.07	1.33	0.01
		Treatment	0.8	0.34	1.19	1.33	0.01
4	Es-4	Control	3.54	3.2	6.53	5	0.08
		Control	3.81	3.2	5.97	5	0.1
		Control	3.08	2.26	5.63	5	0.11
		Control	4.06	2.64	6.58	4	0.08
		Control	3.32	2.46	5.56	4	0.11
		Treatment	2.25	1.95	3.96	5	0.04
		Treatment	2.31	2.29	4.12	4	0.04
		Treatment	1.92	2.31	3.67	4	0.04
		Treatment	1.89	1.67	3.57	3	0.05
		Treatment	1.97	1.66	3.83	3	0.04
5	Es-5	Control	2.36	1.71	4.5	4	0.07
		Control	2.39	1.7	4.89	4	0.06
		Control	2.18	1.56	4.78	5	0.06
		Control	2.68	1.64	4.17	5	0.07
		Control	2.79	1.65	4.2	4	0.07
		Treatment	1.04	1.1	2.07	2	0.06
		Treatment	1.18	1.05	2.19	2	0.06
		Treatment	1.42	1.06	2.42	2	0.06
		Treatment	0.83	0.87	1.89	2	0.05
		Treatment	0.92	0.79	1.87	2	0.05
6	Es-6	Control	1.84	1.48	3.42	5	0.06
		Control	2.02	1.53	3.43	5	0.06
		Control	1.76	1.29	3.21	4	0.11
		Control	2.24	1.71	4.04	5	0.12
		Control	2.17	1.39	3.66	4	0.05
		Treatment	1.21	1.23	2.63	3	0.03
		Treatment	1.19	0.81	1.93	4	0.02
		Treatment	1.14	0.98	2.13	4	0.04
		Treatment	1.29	1.12	2.42	4	0.02
		Treatment	1.33	1.08	1.81	4	0.04
7	Es-7	Control	1.87	2.3	3.94	4	0.09
		Control	2.05	2.35	4.24	4	0.06
		Control	1.65	2.12	3.81	4	0.08
		Control	2.24	1.95	4.02	4	0.08
		Control	1.94	2.21	4.41	4	0.07
		Treatment	0.98	1.1	2.25	2	0.06
		Treatment	1.02	1.17	2.18	2	0.05
		Treatment	1.82	1.02	2.96	2	0.04
		Treatment	1.67	1.21	2.97	2	0.07
		Treatment	1.96	1.23	3.1	4	0.06
8	Es-8	Control	2.65	2.12	4.74	5	0.06
		Control	2.72	2.04	4.77	5	0.07
		Control	3.52	1.5	4.36	5	0.07
		Control	2.9	1.81	4.72	5	0.08
		Control	3.05	1.54	4.71	5	0.07
		Treatment	0.91	1.21	2.16	3	0.03
		Treatment	1.06	0.97	2.09	2	0.05
		Treatment	0.91	0.85	1.75	2	0.04
		Treatment	0.87	1.46	2.37	3	0.06
		Treatment	0.83	0.78	1.52	2	0.04
9	Es-9	Control	2.37	1.93	4.3	4	0.07
		Control	2.91	2	4.91	4	0.09
		Control	2.04	2.92	4.96	4	0.07
		Control	2.34	2.14	4.48	4	0.06
		Control	2.42	2.17	4.59	4	0.06
		Treatment	2.08	1.56	3.64	3	0.04
		Treatment	1.31	1.16	2.47	3	0.04
		Treatment	1.76	1.57	3.33	3	0.04
		Treatment	1.33	1.15	2.47	3	0.04
		Treatment	2.05	1.53	3.58	3	0.05
10	Es-10	Control	1.42	1.97	3.47	5	0.1
		Control	1.41	1.24	2.51	5	0.08
		Control	1.1	1.55	2.78	5	0.09
		Control	1.44	1.53	3.12	5	0.08
		Control	1.51	1.77	3.32	5	0.06
		Treatment	1.03	0.8	2.43	3	0.07
		Treatment	1.05	0.78	1.62	2	0.07
		Treatment	1.12	0.8	1.76	2	0.06
		Treatment	1.14	0.63	1.9	2	0.08
		Treatment	0.97	0.75	1.76	2	0.07
11	Es-11	Control	2.34	1.35	3.77	5	0.05
		Control	1.72	1.48	3.3	5	0.04
		Control	2.07	1.98	4.15	4	0.06
		Control	2.14	2.34	4.35	4	0.08
		Control	2.05	2.32	4.37	4	0.05
		Treatment	1.62	1.38	1.68	4	0.03
		Treatment	0.92	0.78	2.49	4	0.03
		Treatment	1	1.42	2.55	3	0.05
		Treatment	1.22	1.22	2.58	4	0.06
		Treatment	1.58	0.84	2.33	3	0.06
12	Es-12	Control	1.67	1.76	3.43	4	0.06
		Control	1.65	1.7	3.36	4	0.07
		Control	1.81	1.54	3.35	5	0.05
		Control	1.9	1.54	3.44	5	0.06
		Control	1.86	1.77	3.63	4	0.06
		Treatment	1.5	1.42	2.72	3	0.02
		Treatment	1.38	1.54	2.52	3	0.02
		Treatment	1.21	1.19	2.2	3	0.03
		Treatment	1.25	1.01	2.12	3	0.02
		Treatment	1.51	0.95	2.26	3	0.03
13	Es-13	Control	3.1	2.14	5.24	5	0.07
		Control	2.87	2.66	5.54	5	0.06
		Control	2.69	2.69	5.73	5	0.07
		Control	2.39	2.5	5.08	5	0.09
		Control	2.62	2.5	5.12	5	0.08
		Treatment	1.9	1.19	3.09	4	0.04
		Treatment	2	1.52	3.52	4	0.04
		Treatment	2.04	1.3	3.34	4	0.05
		Treatment	2.06	1.84	3.9	4	0.04
		Treatment	1.85	1.33	3.19	4	0.05
14	Es-14	Control	2.27	2.17	4.66	5	0.1
		Control	2.8	2.44	4.74	6	0.09
		Control	2.11	2.1	4.79	6	0.08
		Control	2.1	2.5	4.96	5	0.08
		Control	2.17	2.83	4.78	6	0.07
		Treatment	1.33	1.63	3.08	4	0.03
		Treatment	1.08	1.46	2.52	3	0.03
		Treatment	0.85	1.48	2.32	3	0.04
		Treatment	1.35	1.21	2.79	3	0.02
		Treatment	1.56	1.65	3.3	3	0.03
15	Es-15	Control	1.84	2.58	4.36	5	0.07
		Control	2.12	2.27	4.52	5	0.05
		Control	1.89	2.35	4.28	5	0.05
		Control	2.42	2.49	4.38	4	0.05
		Control	2.07	2.42	4.38	4.75	0.05
		Treatment	0.31	1.26	2.45	2	0.01
		Treatment	0.37	0.79	1.16	2	0.01
		Treatment	0.3	1.42	2.08	1	0.01
		Treatment	0.35	0.6	1.08	2	0.01
		Treatment	0.4	0.78	1.44	1	0.01
16	Es-16	Control	2.37	2	4.3	4	0.07
		Control	2.91	2.92	4.91	5	0.09
		Control	2.04	2.14	4.96	5	0.07
		Control	2.34	2.17	4.48	5	0.06
		Control	2.42	2.31	4.59	4	0.06
		Treatment	0.87	0.52	1.39	2	0.01
		Treatment	0.54	0.31	1.14	1	0.01
		Treatment	0.78	0.56	1.34	1	0.01
		Treatment	0.48	0.53	1.07	1.33	0.02
		Treatment	0.8	0.34	1.19	1.33	0.01
17	Es-17	Control	2.21	1.83	4.38	5	0.09
		Control	2.68	2.15	4.98	5	0.08
		Control	2.22	2.41	4.28	5	0.08
		Control	2.66	2.52	5.13	5	0.07
		Control	2.41	2.22	4.69	5	0.06
		Treatment	0.59	0.49	1.39	2	0.02
		Treatment	0.53	0.47	1.14	1	0.02
		Treatment	0.47	0.47	1.34	1	0.03
		Treatment	0.71	0.43	1.07	1	0.02
		Treatment	0.68	0.39	1.19	2	0.02
18	Es-18	Control	3.37	3.26	6.47	5	0.08
		Control	3.21	2.96	6.49	5	0.08
		Control	3.53	2.4	5.06	5	0.07
		Control	2.66	3	5.46	6	0.06
		Control	2.46	2.9	5.87	5	0.08
		Treatment	0.59	0.45	1.22	2	0.01
		Treatment	0.53	0.47	0.98	2	0.01
		Treatment	0.67	0.47	1.21	2	0.02
		Treatment	0.51	0.43	1.27	2	0.01
		Treatment	0.68	0.49	1.14	2	0.01
19	Es-19	Control	2.71	2.12	4.83	5	0.05
		Control	2.13	2.35	4.48	2	0.06
		Control	2.14	2.12	4.25	3	0.05
		Control	2.17	2.22	4.39	4	0.02
		Control	2.1	2.09	4.19	3	0.03
		Treatment	1.33	1.63	3.08	4	0.03
		Treatment	1.08	1.46	2.52	3	0.03
		Treatment	0.85	1.48	2.32	3	0.04
		Treatment	1.35	1.21	2.79	3	0.02
		Treatment	1.56	1.65	3.3	3	0.03
20	Es-20	Control	1.75	1.85	3.59	3	0.04
		Control	1.96	2.71	4.67	3	0.04
		Control	1.94	2.32	4.26	3	0.03
		Control	2.47	2.02	4.48	3	0.04
		Control	1.83	2.81	4.65	3	0.04
		Treatment	0.31	1.26	3.08	2	0.01
		Treatment	0.37	0.79	2.52	2	0.01
		Treatment	0.3	1.42	2.32	1	0.02
		Treatment	0.35	0.6	2.79	2	0.01
		Treatment	0.4	0.78	3.3	1	0.01
21	Es-21	Control	2.18	2.55	4.73	3	0.03
		Control	1.93	2.55	4.48	3	0.04
		Control	2.22	2.71	4.93	3	0.04
		Control	1.8	2.86	4.66	3	0.03
		Control	2.04	2.74	4.78	4	0.06
		Treatment	0.59	0.45	2.45	2	0.02
		Treatment	0.53	0.47	1.16	2	0.01
		Treatment	0.67	0.47	2.08	2	0.02
		Treatment	0.51	0.43	1.44	2	0.02
		Treatment	0.68	0.49	1.78	2	0.02
22	Es-22	Control	1.75	2.71	3.59	5	0.04
		Control	1.96	2.32	4.67	2	0.04
		Control	1.94	2.02	4.26	3	0.05
		Control	2.47	2.81	4.48	4	0.04
		Control	1.83	2.47	4.65	3	0.04
		Treatment	1.62	0.69	2.31	2	0.04
		Treatment	1.04	0.79	1.83	2	0.03
		Treatment	1.42	0.95	2.86	2	0.04
		Treatment	0.86	0.68	1.8	2	0.03
		Treatment	1.15	0.78	1.83	2	0.04
23	Es-23	Control	1.89	2.17	4.06	3	0.04
		Control	1.6	1.31	2.91	3	0.05
		Control	1.59	1.53	3.12	3	0.05
		Control	1.75	1.94	3.69	3	0.05
		Control	1.84	2.05	3.89	3	0.06
		Treatment	0.56	0.43	0.99	2	0.03
		Treatment	0.53	0.51	1.04	2	0.04
		Treatment	0.59	0.5	1.09	2	0.03
		Treatment	0.75	0.44	1.2	2	0.03
		Treatment	0.73	0.78	1.51	2	0.03
24	Es-24	Control	1.22	0.95	2.37	3	0.05
		Control	1.38	1.62	3.13	3	0.03
		Control	1.29	1.47	2.84	3	0.03
		Control	1.53	1.93	3.33	3	0.06
		Control	1.57	1.07	2.54	3	0.03
		Treatment	0.75	0.56	1.51	1	0.03
		Treatment	0.78	0.47	1.22	2	0.04
		Treatment	0.74	0.45	1.25	2	0.03
		Treatment	0.71	0.49	1.25	1	0.03
		Treatment	0.76	0.48	1.08	2	0.03
25	Es-25	Control	1.75	2.85	4.73	3	0.04
		Control	1.96	2.71	4.59	3	0.04
		Control	2.94	2.32	5.55	3	0.03
		Control	2.47	3.02	5.5	3	0.05
		Control	2.83	2.81	5.54	3	0.05
		Treatment	0.96	0.63	1.68	2	0.04
		Treatment	0.98	0.63	1.65	2	0.03
		Treatment	1.3	0.7	1.95	2	0.04
		Treatment	1.42	0.61	1.98	2	0.05
		Treatment	1.17	0.65	1.93	2	0.05

## Sheet: FW DW RWC Ions EL
			Fresh weight (mg)	Dry weight (mg)	RWC (%)	Sodium (mg/g DW)	Potassium (mg/g DW)	Calcium (mg/g DW)	Magnesium (mg/g DW)	K/Na ratio	Electrolyte leakage (%)
Sr No	Accession
1	Es-1	Control	361.2	22.6	74.96	4.44	8.46	3.98	2.54	1.91	49.71
		Control	344.7	19.3	71.83	4.7	8.77	4.14	2.98	1.87	52.13
		Control	323.4	20.9	80.73	4.66	8.93	3.93	2.69	1.92	51.37
		Treatment	179.42	18.67	89.89	21.33	12.01	2.99	2.14	0.56	49.43
		Treatment	170.83	17.33	89.77	21.76	11.51	3.98	2.89	0.53	48.03
		Treatment	165.67	18.17	89.77	21.41	11.13	3.57	2.59	0.52	47.81
2	Es-2	Control	163.4	13.2	85.09	5.97	8.64	4.01	3.23	1.45	60.63
		Control	180.2	10.8	68.16	6.28	8.77	4.52	3.78	1.4	63.05
		Control	175.8	11.9	61.54	5.86	9.02	4.32	3.45	1.54	61.9
		Treatment	62.63	9.5	91.88	24.14	12.97	3.91	2.52	0.54	62.64
		Treatment	56.75	8.13	91.75	23.57	13.09	3.55	3.02	0.56	60.99
		Treatment	57.13	9.38	91.58	23.88	12.91	3.77	2.96	0.54	63.85
3	Es-3	Control	308	16	76.81	7.21	9.65	5.41	3.77	1.39	62.34
		Control	317.6	15.6	76.85	7.41	9.09	5.9	3.87	1.23	67.74
		Control	338.2	16.2	77.03	7.7	10.03	5.77	3.72	1.3	63.72
		Treatment	32.71	3.79	88.82	16.21	15.63	5.4	3.65	0.96	88.01
		Treatment	33.36	3.93	88.98	17.9	13.29	6	3.47	0.74	68.4
		Treatment	32.21	4.07	89.87	16.88	14.46	5.81	3.53	0.86	79.6
4	Es-4	Control	346.33	19.17	96.01	7.15	7.05	3.32	5.22	0.99	61.63
		Control	359.83	20.17	95.9	6.99	6.87	1.98	4.91	0.98	60.29
		Control	336.5	19.83	96.19	7.11	6.89	2.76	5.19	0.97	61
		Treatment	177.29	12.21	96.01	21.23	9.26	2.86	3.61	0.44	68.45
		Treatment	161.86	12.43	96.5	23.04	10.37	3.03	4.15	0.45	66.93
		Treatment	158.71	12.71	96.51	22.22	9.59	2.88	3.89	0.43	61.54
5	Es-5	Control	223.4	12	91.44	10.22	12.97	5.6	7.61	1.27	50.19
		Control	215.2	13	90.92	9.73	11.23	4.96	6.67	1.15	49.06
		Control	229.8	13.8	91.81	9.95	11.98	5.31	7.45	1.2	49.71
		Treatment	170.4	11.3	94.52	27.07	13.05	4.17	4.77	0.48	66.92
		Treatment	177.2	10.4	95.2	27.98	12.91	3.75	5.02	0.46	69.4
		Treatment	163	10.8	94.19	27.55	13.11	4.11	4.88	0.48	60.96
6	Es-6	Control	745.8	32	98.58	10.84	12.81	2.97	6.08	1.18	58.78
		Control	761.2	33	98.91	10.54	11.45	3.27	4.15	1.09	60.39
		Control	757.4	32.6	98.91	10.63	12.37	3.04	5.31	1.16
		Treatment	231.63	10.25	96.12	25.25	14.28	1.99	3.4	0.57	58.1
		Treatment	239.38	10.38	95.67	24.98	15.19	3.99	4.29	0.61	58.81
		Treatment	243.38	10.75	96.23	24.81	14.66	2.63	2.87	0.59
7	Es-7	Control	321.4	11	96.82	14.01	16.08	3.82	3.83	1.15	49.39
		Control	324.2	10.2	98.25	12.43	17.09	4	3.47	1.37	44.31
		Control	323.8	10.6	97.39	13.01	16.77	4.11	3.78	1.29	46.81
		Treatment	97	8.57	96.57	29.43	17.51	2.33	3	0.59	50.12
		Treatment	96	8.29	95.05	31.73	16.53	3.82	2.41	0.52	48.53
		Treatment	96.43	8.71	96.39	31.02	16.88	2.97	2.73	0.54	51.47
8	Es-8	Control	244	11	94.41	15.07	17.29	8.88	9.39	1.15	72.41
		Control	245.2	10.4	94.75	16.01	17.95	6.51	9.6	1.12	68.98
		Control	246.2	12.2	94.58	15.69	17.55	7.96	9.48	1.12	67.87
		Treatment	76.25	5.63	92.78	32.88	21.66	5.38	8.72	0.66	82.62
		Treatment	75.63	5.88	91.33	30.82	22.39	7.45	9.11	0.73	84.43
		Treatment	76.63	5.25	91.95	32	21.85	6.33	8.71	0.68	83.44
9	Es-9	Control	59.78	3.78	90.96	15.8	37.6	8.98	9.95	2.38	53.07
		Control	60.78	3.44	91.81	16.8	29.88	9	6.34	1.78	49.89
		Control	61.22	3.22	91.9	16.04	32.73	8.98	8.05	2.04	49.52
		Treatment	50.56	2.78	90.53	32.02	42	14.55	5.07	1.31	55.83
		Treatment	51.11	2.67	90.83	31.62	40.41	12.27	5.62	1.28	57.36
		Treatment	50.89	2.71	89.42	31.91	41.51	13.57	5.29	1.3	56.67
10	Es-10	Control	437	16	97.32	10.91	11.86	4.58	3.02	1.09	53.99
		Control	435.2	15.6	96.33	8.52	13.69	4.79	3.67	1.61	58.12
		Control	433	16.4	95.59	10.02	11.99	4.71	3.64	1.2	54.74
		Treatment	177.22	7.22	94.33	36.71	15.58	8.11	2.69	0.42	56.1
		Treatment	177.56	7.44	94.68	35.13	17.82	9.03	3.05	0.51	56.58
		Treatment	177.78	6.89	95.17	36.11	16.73	8.41	2.98	0.46	55.33
11	Es-11	Control	201.57	7.14	94.53	15.31	18.68	10.51	4.06	1.22	55.02
		Control	209.86	7.43	94.78	16.34	18.11	9.06	4.76	1.11	53.43
		Control	199.71	7.57	94.78	14.92	18.37	10.01	4.44	1.23
		Treatment	149.73	6.33	96.1	18.11	19.6	12.16	3.87	1.08	51.34
		Treatment	138.82	5.91	96.03	19.54	21.82	9.88	4.58	1.12	56.11
		Treatment	145.27	7.05	95.56	17.96	20.72	10.96	4.31	1.15	55.17
12	Es-12	Control	246.8	11	94.77	16.29	12.88	3.97	5.63	0.79	56.52
		Control	247.4	10.6	94.72	17	16.32	4.07	6.51	0.96	59.29
		Control	247.6	10.2	95.04	17.24	14.42	3.91		0.84	58.23
		Treatment	192.6	10	94.88	19.29	9.75	7.29	4.41	0.51	56.09
		Treatment	193.2	8.2	94.72	20.93	13.96	6.99	5.99	0.67	59.98
		Treatment	194	9.6	96	20.71	12.23	7.15	6.12	0.59	61
13	Es-13	Control	449	11	96.05	11.1	15.51	5.92	4.31	1.4	44.16
		Control	449.6	10.8	96.14	10.03	14.99	4.98	4.6	1.49	50.14
		Control	449.4	11.2	96.01	10.53	14.77	5.51	4.61	1.4
		Treatment	177	8.75	94.72	27.1	15.4	7.65	2.65	0.57	46.61
		Treatment	176.63	9.13	94.77	28.6	15.89	8.35	3.63	0.56	49.31
		Treatment	176.5	9.63	94.28	28.02	16.03	7.99	3.18	0.57	47.61
14	Es-14	Control	426.2	14	97.35	11.73	13.21	4.21	4.43	1.13	50.92
		Control	425.8	13.8	97.31	13.7	12.87	5.14	3.98	0.94	48.13
		Control	426	14.2	97.4	13.11	13.01	3.93	4.16	0.99	50.11
		Treatment	166	8.33	94.32	36.89	18.16	9.75	3.16	0.49	54.09
		Treatment	165.17	9	93.89	34.22	19.36	10.63	4.26	0.57	56.2
		Treatment	165.5	8.5	94.48	35.61	19.21	9.99	3.77	0.54	55.21
15	Es-15	Control	251.2	12	95.22	15.39	13.48	4.97	4.87	0.88	60.65
		Control	250.6	11.6	95.3	16.29	11.82	3.53	4.19	0.73	58.27
		Control	251.8	12.2	95.84	15.59	12.65	3.89	3.96	0.81
		Treatment	36.5	3.5	91.29	22.06	17.41	5.52	2.23	0.79	61.54
		Treatment	36.7	3.7	92.05	21.06	16.44	6	4.01	0.78	62.93
		Treatment	37.1	3.8	92.24	21.73	17.21	5.86	3.41	0.79
16	Es-16	Control	77.13	3.75	90.59	8.62	13.26	4.73	3.27	1.54	50.72
		Control	77.25	3.38	91.49	12.41	14	6.27	4.71	1.13	48.38
		Control	76.63	3.88	90.37	11	13.64	5.47	3.63	1.24	48.42
		Treatment	32.71	3.09	88.82	22.58	16.67	12.71	1.98	0.74	50.84
		Treatment	33.36	2.93	88.98	23.18	22.06	11.56	3.67	0.95	53.27
		Treatment	33.21	3.07	89.87	23.15	19	12	2.71	0.82
17	Es-17	Control	211.6	10	94.65	17.75	17.91	7.02	5.83	1.01	61.12
		Control	208.4	10.2	93.67	18.12	16.67	7.79	6.68	0.92	57.63
		Control	210.6	11	94.42	17.76	16.82	6.96	6.27	0.95	61.76
		Treatment	36	2.78	90.06	54.38	27.54	25.16	4.16	0.51	64.01
		Treatment	36.56	3.22	91.74	39.75	25.86	20.79	5.02	0.65	63.54
		Treatment	36.11	3.56	92.14	46.99	26.34	23.54	4.65	0.56
18	Es-18	Control	306.8	8	95.95	26.03	22.62	5.99	5.86	0.87	63.33
		Control	308.2	8.6	96.9	23.02	23.02	3.99	4.29	1	60.23
		Control	308.8	9.4	96.83	25.11	22.79	4.68	5	0.91	63.01
		Treatment	40.83	2.92	88.52	41.08	23.66	12.02	3.62	0.58	68.84
		Treatment	41.25	2.67	88.7	35.06	27.51	15.21	4.06	0.78	67.37
		Treatment	40.75	3.25	88.58	38.27	24.93	13.45	3.61	0.65
19	Es-19	Control	104.75	5.25	93.1	12.14	19.32	2.21	5.63	1.59	58.43
		Control	104.88	5.63	92.97	12.91	17.28	2.89	6.29	1.34	57.05
		Control	105.13	5.13	92.81	12.49	18.5	2.72	6.06	1.48	57.84
		Treatment	70.77	4.23	94.85	35.39	22.43	7	3.37	0.63	58.48
		Treatment	70.38	3.92	94.53	30.07	21.96	6.67	4.19	0.73	60.38
		Treatment	70.15	4.46	93.44	31.74	22.11	7.17	3.77	0.7
20	Es-20	Control	42	3	88.44	13.36	25.94	14.68	7.73	1.94	64.24
		Control	42.5	3.2	88.31	14	27.12	12.28	5.89	1.94	60.29
		Control	42.8	3.4	88.14	14.12	26.46	13.44	6.89	1.87
		Treatment	30	2.5	91.67	55.05	31.72	22.22	5.16	0.58	65.81
		Treatment	30.3	2.7	91.09	41.51	35.18	21.02	4.32	0.85	64.37
		Treatment	30.6	2.9	92.95	47.78	33.16	21.61	4.83	0.69
21	Es-21	Control	90.33	3.89	94.76	27.06	25.01	7.57	12.6	0.92	43.45
		Control	90.78	4.22	95.58	22.65	24.63	8.84	9.47	1.09	48.48
		Control	90.56	4.44	94.63	25	24.79	8.44	9.55	0.99	47.55
		Treatment	61.7	3	95.45	45.92	29.01	12.47	6.36	0.63	45.53
		Treatment	61.4	3.5	95.39	43.93	31.75	11.63	5.29	0.72	52.03
		Treatment	60.9	3.1	94.91	44.09	30.48	11.98	5.83	0.69
22	Es-22	Control	48.28	1.94	96.53	16.44	12.41	10.02	5.81	0.75	61.89
		Control	48.33	2.11	96.3	17	13.02	8.75	5.25	0.77	58.03
		Control	48.61	2.22	96.64	17.16	12.68	10	5.59	0.74
		Treatment	35.92	1.29	95.9	30.4	16.11	14.19	4.22	0.53	71.29
		Treatment	36.16	1.36	96.13	26.45	15.21	12.27	5.28	0.58	69.11
		Treatment	35.68	1.32	95.76	27.79	15.58	13.53	4.47	0.56	73.37
23	Es-23	Control	137.83	3.83	94.37	18.02	11.99	9.93	2.73	0.67	64.56
		Control	138.17	4.17	94.48	16.71	9.86	7.98	3.58	0.59	63.03
		Control	138.33	4.5	94.47	17.51	10.97	8	3.2	0.63	63.55
		Treatment	37.5	3.19	90.44	25.81	15.9	9.81	2.42	0.62	66.43
		Treatment	37.81	3.56	91.33	27.97	17.26	10.09	2.18	0.62	66.38
		Treatment	38.06	3.31	93.13	26.33	16.35	9.81	2.23	0.62
24	Es-24	Control	107.2	7.4	90.4	14.09	13.81	6.06	16.98	0.98	62.19
		Control	108	7.6	90.94	13.58	14.36	6.69	11.99	1.06	60.04
		Control	108.2	8	91.59	13.81	13.55	6.43	13.78	0.98	61.55
		Treatment	66	2.78	88.63	28.33	19.99	7.03	4.53	0.71	69.14
		Treatment	66.44	3.44	89.72	29.22	18.43	7.77	6.29	0.63	67.05
		Treatment	66.78	3.22	90.51	27.44	18.89	7.4	5.98	0.69	66.33
25	Es-25	Control	94.86	5	93.32	14.64	16.22	5.63	12.13	1.11	47.28
		Control	95.29	5.29	93.47	15.67	11.48	6.02	10.68	0.73	53.29
		Control	95.86	5.57	95.18	16.05	14.11	5.79	11.26	0.88	51.18
		Treatment	39.8	4.4	90.92	42.16	27.06	12.93	11.42	0.64	47.31
		Treatment	39.93	4.53	90.15	41.71	25.11	11.39	8.55	0.6	49.9
		Treatment	40.07	4	90.65	42.05	26.52	10.96	9.89	0.63	48.63

## Sheet: Chlorophyll content
			Chlorophyll content (CCI)
1	Es-1	Control	16.2
		Control	21.9
		Control	19.5
		Control	15.4
		Control	12.1
		Control	16.2
		Treatment	14.3
		Treatment	14
		Treatment	14.2
		Treatment	13.2
		Treatment	13.5
		Treatment	12.7
2	Es-2	Control	27
		Control	24
		Control	22
		Control	19.9
		Control	16.8
		Control	17.3
		Treatment	13.1
		Treatment	16.2
		Treatment	15.9
		Treatment	13.9
		Treatment	15
		Treatment	17.1
3	Es-3	Control	19
		Control	18.9
		Control	16.9
		Control	18.2
		Control	21
		Control	18
		Treatment	16.4
		Treatment	11.3
		Treatment	12.4
		Treatment	10.8
		Treatment	15.3
		Treatment	13
4	Es-4	Control	17.5
		Control	15.7
		Control	14.2
		Control	18.6
		Control	17.4
		Control	18
		Treatment	15.6
		Treatment	15.2
		Treatment	16.3
		Treatment	16
		Treatment	15
		Treatment	17.2
5	Es-5	Control	23.8
		Control	26.3
		Control	25.8
		Control	27.8
		Control	18.7
		Control	19.9
		Treatment	17
		Treatment	17.2
		Treatment	16
		Treatment	15.9
		Treatment	18
		Treatment	16.82
6	Es-6	Control	14.5
		Control	16
		Control	19
		Control	17.2
		Control	17.8
		Control	18
		Treatment	12.5
		Treatment	13.1
		Treatment	12.1
		Treatment	12.6
		Treatment	12.3
		Treatment	12.9
7	Es-7	Control	25
		Control	29
		Control	20.8
		Control	26
		Control	30
		Control	27
		Treatment	38.2
		Treatment	38.7
		Treatment	35
		Treatment	28
		Treatment	25
		Treatment	23
8	Es-8	Control	10.6
		Control	10.8
		Control	9.7
		Control	8.9
		Control	8.8
		Control	10
		Treatment	6.5
		Treatment	7
		Treatment	6.9
		Treatment	8
		Treatment	6.9
		Treatment	6.3
9	Es-9	Control	25
		Control	29
		Control	26
		Control	30
		Control	27
		Control	27.4
		Treatment	38.2
		Treatment	38.7
		Treatment	35
		Treatment	28
		Treatment	25
		Treatment	23
10	Es-10	Control	16.4
		Control	18.4
		Control	18.9
		Control	19
		Control	20
		Control	18.4
		Treatment	12
		Treatment	14
		Treatment	12
		Treatment	15
		Treatment	11
		Treatment	14
11	Es-11	Control	13.6
		Control	13.9
		Control	15
		Control	14.7
		Control	15
		Control	13.7
		Treatment	8
		Treatment	8.6
		Treatment	9.8
		Treatment	11.2
		Treatment	9
		Treatment	9.5
12	Es-12	Control	18.2
		Control	17.8
		Control	17.3
		Control	10.9
		Control	11.2
		Control	18.6
		Treatment	13.8
		Treatment	14.6
		Treatment	14.2
		Treatment	15
		Treatment	15.6
		Treatment	13
13	Es-13	Control	17.2
		Control	14.4
		Control	15.3
		Control	13.9
		Control	15.9
		Control	13.3
		Treatment	6.2
		Treatment	8.1
		Treatment	9.1
		Treatment	9.3
		Treatment	12.9
		Treatment	8.9
14	Es-14	Control	24
		Control	27
		Control	27
		Control	24
		Control	26
		Control	21.3
		Treatment	16
		Treatment	17.6
		Treatment	16
		Treatment	19
		Treatment	19.5
		Treatment	17
15	Es-15	Control	16.7
		Control	16.6
		Control	16.2
		Control	17
		Control	16
		Control	16.8
		Treatment	9.5
		Treatment	9.3
		Treatment	9.8
		Treatment	9.3
		Treatment	9.9
		Treatment	10
16	Es-16	Control	20.7
		Control	20.9
		Control	23.9
		Control	21
		Control	20
		Control	20.8
		Treatment	12
		Treatment	11
		Treatment	14
		Treatment	14
		Treatment	13
		Treatment	12
17	Es-17	Control	17
		Control	14
		Control	14.9
		Control	15
		Control	16.2
		Control	14
		Treatment	8.1
		Treatment	8
		Treatment	8.9
		Treatment	9.3
		Treatment	11
		Treatment	10
18	Es-18	Control	9.6
		Control	9.2
		Control	9.3
		Control	9.3
		Control	10
		Control	10.3
		Treatment	13
		Treatment	13.9
		Treatment	12
		Treatment	11.2
		Treatment	11.9
		Treatment	13
19	Es-19	Control	19
		Control	21
		Control	20
		Control	16
		Control	16.5
		Control	20
		Treatment	19.1
		Treatment	16.9
		Treatment	18
		Treatment	14.4
		Treatment	15.7
		Treatment	15
20	Es-20	Control	20.7
		Control	20.9
		Control	23.9
		Control	24
		Control	23
		Control	20.8
		Treatment	17
		Treatment	15
		Treatment	14
		Treatment	14
		Treatment	13
		Treatment	15
21	Es-21	Control	9.4
		Control	10.2
		Control	9.6
		Control	10.2
		Control	10.3
		Control	10
		Treatment	16.5
		Treatment	19.1
		Treatment	18.2
		Treatment	15.3
		Treatment	16
		Treatment	16.3
22	Es-22	Control	20.1
		Control	19.5
		Control	19.3
		Control	17
		Control	19.1
		Control	18.9
		Treatment	9.9
		Treatment	10.2
		Treatment	8.6
		Treatment	6.1
		Treatment	6.2
		Treatment	7.1
23	Es-23	Control	23
		Control	24
		Control	27
		Control	20
		Control	18
		Control	17
		Treatment	8.8
		Treatment	9.3
		Treatment	9.8
		Treatment	8.6
		Treatment	7.6
		Treatment	8.9
24	Es-24	Control	13.2
		Control	13.3
		Control	15.8
		Control	13.1
		Control	14.9
		Control	15
		Treatment	8.2
		Treatment	8.6
		Treatment	10.1
		Treatment	10.4
		Treatment	10.2
		Treatment	9
25	Es-25	Control	21
		Control	20
		Control	21
		Control	19
		Control	20
		Control	18
		Treatment	11.8
		Treatment	12.2
		Treatment	12.8
		Treatment	13.5
		Treatment	13.4
		Treatment	14

## Sheet: Gas Exchange parameters
			Photosynthesis rate	Intercellular CO2	Transpiration rate	Stomatal conductance
Sr No			(µmolm-2s-1)	μmol mol–1	(mmol m-2 s-1)	(mmolm-2s-1)
1	Es-1	Control	11.66	287	3.04	0.21
		Control	13	300	3.28	0.15
		Control	13	272	3.46	0.29
		Control	12	285	2.86	0.22
		Treatment	4.85	231	2.13	0.1
		Treatment	5.17	260	1.14	0.05
		Treatment	3.63	246	1.95	0.12
		Treatment	4.85	245	1.32	0.04
2	Es-2	Control	3.05	219	0.91	0.04
		Control	2.43	324	0.9	0.04
		Control	4.39	234	0.73	0.06
		Control	1.09	309	1.08	0.03
		Treatment	1.56	287	1.1	0.04
		Treatment	2	290	1.14	0.04
		Treatment	1.68	302	0.92	0.06
		Treatment	1.88	275	1.32	0.03
3	Es-3	Control	20	296	4.46	0.35
		Control	14	285	3.9	0.27
		Control	21.34	311	4.28	0.43
		Control	12.66	270	4.08	0.2
		Treatment	0.86	253	0.33	0.01
		Treatment	1.82	263	0.78	0.03
		Treatment	1.18	268	0.51	0.03
		Treatment	1.5	248	0.6	0.02
4	Es-4	Control	12	279	3.55	0.21
		Control	14	279	3.55	0.21
		Control	13.34	294	3.37	0.29
		Control	12.66	264	3.73	0.14
		Treatment	3.2	245	0.96	0.04
		Treatment	3.6	301	1.8	0.08
		Treatment	3.52	260	1.14	0.06
		Treatment	3.28	286	1.62	0.07
5	Es-5	Control	8.1	249	2.24	0.11
		Control	10.11	311	4.65	0.29
		Control	9.44	264	2.06	0.19
		Control	8.77	296	4.83	0.22
		Treatment	3.45	314	3.05	0.07
		Treatment	1.8	311	0.82	0.03
		Treatment	3.77	329	2.87	0.09
		Treatment	1.48	296	1	0.02
6	Es-6	Control	4.92	285	3.99	0.21
		Control	5	278	3.77	0.19
		Control	6.26	300	3.81	0.29
		Control	3.66	263	3.95	0.12
		Treatment	1.75	326	1.57	0.06
		Treatment	0.7	304	0.49	0
		Treatment	2.07	341	1.39	0.05
		Treatment	0.38	289	0.67	0.02
7	Es-8	Control	2.82	311	1.54	0.06
		Control	2.89	290	1.6	0.07
		Control	4.16	326	1.36	0.05
		Control	1.55	275	1.78	0.09
		Treatment	1.49	322	1.05	0.04
		Treatment	1.58	344	1.55	0.06
		Treatment	1.81	337	1.23	0.03
		Treatment	1.26	329	1.37	0.08
8	Es-9	Control	14.62	260	3.82	0.22
		Control	13.4	250	3.1	0.23
		Control	15.96	275	3.64	0.3
		Control	12.06	235	3.28	0.16
		Treatment	3.42	233	0.91	0.04
		Treatment	1.5	269	0.45	0.02
		Treatment	3.74	248	0.73	0.03
		Treatment	1.18	254	0.63	0.04
9	Es-10	Control	10.93	283	4.22	0.22
		Control	6.67	280	2.74	0.12
		Control	12.27	298	4.04	0.15
		Control	5.33	265	2.92	0.2
		Treatment	1.75	282	0.83	0.06
		Treatment	3.28	235	1.64	0.06
		Treatment	2.07	297	0.65	0.05
		Treatment	2.96	220	1.82	0.08
10	Es-11	Control	4.35	286	2.24	0.09
		Control	2.22	294	1.05	0.04
		Control	5.69	301	2.06	0.08
		Control	0.88	279	1.23	0.06
		Treatment	1.21	355	0.53	0.02
		Treatment	1.11	303	0.73	0.03
		Treatment	1.53	370	0.35	0.02
		Treatment	0.79	288	0.91	0.03
11	Es-12	Control	8.55	236	2.63	0.12
		Control	9.58	275	3.65	0.18
		Control	9.89	251	2.45	0.2
		Control	8.24	260	3.83	0.11
		Treatment	2.21	279	1.31	0.05
		Treatment	4.41	284	2.38	0.08
		Treatment	2.53	294	1.13	0.05
		Treatment	4.09	269	2.56	0.08
12	Es-13	Control	14.8	294	3.64	0.2
		Control	14.8	294	3.64	0.2
		Control	16.14	309	3.46	0.28
		Control	13.46	279	3.82	0.13
		Treatment	2	220	0.51	0.02
		Treatment	3	227	0.84	0.03
		Treatment	2.32	235	0.69	0.02
		Treatment	2.68	212	0.66	0.03
13	Es-14	Control	9.05	301	3.05	0.23
		Control	8.61	288	2.12	0.17
		Control	10.39	316	2.87	0.16
		Control	7.27	273	2.3	0.25
		Treatment	3.38	319	1.44	0.07
		Treatment	2.98	230	1.06	0.03
		Treatment	3.7	334	1.26	0.06
		Treatment	2.66	215	1.24	0.05
14	Es-15	Control	4.48	335	1.67	0.09
		Control	5.84	296	2.19	0.12
		Control	5.82	350	1.49	0.12
		Control	4.5	281	2.37	0.09
		Treatment	1.23	227	0.28	0.01
		Treatment	1.51	204	0.24	0.01
		Treatment	1.55	242	0.18	0.01
		Treatment	1.19	189	0.34	0.01
15	Es-17	Control	1.27	335	1.04	0.04
		Control	1.01	345	1.09	0.05
		Control	1.59	350	0.86	0.03
		Control	0.69	330	1.27	0.07
		Treatment	0.74	312	0.37	0.02
		Treatment	0.78	318	0.37	0.03
		Treatment	1.06	327	0.24	0.02
		Treatment	0.46	303	0.5	0.03
16	Es-18	Control	2.81	308	1.42	0.07
		Control	2.88	304	1.37	0.06
		Control	3.13	323	1.24	0.06
		Control	2.56	289	1.55	0.08
		Treatment	1.87	354	1.16	0.02
		Treatment	0.98	345	0.84	0.03
		Treatment	2.19	369	0.98	0.02
		Treatment	0.66	330	1.02	0.03
17	Es-19	Control	1.96	292	3.31	0.19
		Control	2.37	282	3.97	0.21
		Control	2.28	307	3.13	0.27
		Control	2.05	267	4.15	0.14
		Treatment	1.4	302	0.49	0.04
		Treatment	1.85	284	0.64	0.03
		Treatment	1.72	317	0.37	0.03
		Treatment	1.53	269	0.76	0.05
18	Es-20	Control	12.7	238	3	0.16
		Control	12.7	238	3	0.16
		Control	14.04	253	2.82	0.21
		Control	11.36	223	3.18	0.12
		Treatment	2.3	166	0.45	0.02
		Treatment	1.2	265	0.47	0.02
		Treatment	2.62	181	0.34	0.02
		Treatment	0.88	250	0.58	0.02
19	Es-21	Control	13.85	276	4.32	0.3
		Control	10.52	272	3.96	0.19
		Control	15.19	291	4.14	0.23
		Control	9.18	257	4.14	0.27
		Treatment	3	238	1.59	0.07
		Treatment	2.15	293	0.87	0.04
		Treatment	3.32	253	1.41	0.06
		Treatment	1.83	278	1.05	0.06
20	Es-22	Control	4.42	239	1.34	0.06
		Control	4.11	279	1.31	0.05
		Control	5.76	254	1.16	0.05
		Control	2.77	264	1.49	0.07
		Treatment	0.83	275	0.65	0.04
		Treatment	1.66	275	1	0.02
		Treatment	1.15	290	0.83	0.04
		Treatment	1.34	260	0.82	0.02
21	Es-23	Control	5.78	247	1.77	0.07
		Control	4.31	245	1.34	0.05
		Control	7.12	262	1.59	0.06
		Control	2.97	230	1.52	0.07
		Treatment	0.79	265	0.57	0.03
		Treatment	0.76	263	0.75	0.02
		Treatment	1.11	280	0.71	0.03
		Treatment	0.44	248	0.61	0.02
22	Es-24	Control	3.06	309	1.28	0.04
		Control	5.89	244	1.76	0.07
		Control	4.4	324	1.1	0.03
		Control	4.55	229	1.94	0.09
		Treatment	0.89	368	0.55	0.02
		Treatment	0.91	354	0.67	0.03
		Treatment	1.21	383	0.37	0.02
		Treatment	0.59	339	0.85	0.03
23	Es-25	Control	2.31	239	0.85	0.03
		Control	2.23	293	1.12	0.09
		Control	2.63	254	0.67	0.05
		Control	1.91	278	1.3	0.08
		Treatment	0.78	303	0.33	0.02
		Treatment	0.64	398	0.43	0.04
		Treatment	1.1	318	0.47	0.03
		Treatment	0.32	383	0.29	0.03
